# Supplementary material for: Community Pharmacists’ Experiences and Attitudes towards the Provision of Sexual and Reproductive Health Services: An International Survey
Source: MDPI journal article supplement (doi:10.3390/healthcare11111530), 2023-05-24
Supplement: s1 [file s1]

## International comparison of community pharmacists' roles in provision of Sexual and Reproductive Health (SRH) services

### Demographics

1. What is your age range?
  - ☐ 20-30 years
  - ☐ 31-40 years
  - ☐ 41-50 years
  - ☐ 51-60 years
  - ☐ 60-71 years
  - ☐ 70+ years
2. Please indicate your gender
  - ☐ Male
  - ☐ Female
  - ☐ Non-binary
  - ☐ Prefer not to answer
3. How many years of licensure do you have?
  - ☐ < 1 year
  - ☐ 1-5 years
  - ☐ 6-10 years
  - ☐ 11-20 years
  - ☐ 21-30 years
  - ☐ >31 years
4. What is your highest level of education related to pharmacy?
  - ☐ BSc in pharmacy
    - a. 4-years (*Japan only*)
    - b. 6-years (*Japan only*)
  - ☐ Enter-to-practice PharmD
  - ☐ Residency (*Canada only*)
  - ☐ Post-professional or post-baccalaureate PharmD (*Canada only*)
  - ☐ Master's degree (M.Sc. or MPharm)
  - ☐ Ph.D.
  - ☐ Other (please specify): \_\_\_\_\_
5. What is your current position status? Please select all that apply.
  - ☐ Staff Pharmacist (e.g. full time, part time, permanent, etc.)
  - ☐ Relief/Casual Pharmacist
  - ☐ Pharmacy Owner
  - ☐ Pharmacy Manager
  - ☐ Pharmacy Consultant
  - ☐ Other (please specify): \_\_\_\_\_
6. What are the areas in which you primarily practice? Please select all that apply.
  - ☐ Community pharmacy- independent
  - ☐ Community pharmacy- corporate/chain
  - ☐ Community pharmacy- banner/franchise
  - ☐ Drugstore chain (*Japan only*)
  - ☐ Other (please specify): \_\_\_\_\_

### I. Provision of Sexual and Reproductive Health (SRH) Services

Please indicate whether the following products and services are currently provided at the pharmacy where you work as well as plans to provide these products/services in the future.

|                                                                                                           | Currently provided?   |                       | Plan to provide in future? |                       |                       |
|-----------------------------------------------------------------------------------------------------------|-----------------------|-----------------------|----------------------------|-----------------------|-----------------------|
|                                                                                                           | YES                   | NO                    | YES                        | NO                    | DO NOT KNOW           |
| <b>A. Pregnancy Tests</b>                                                                                 |                       |                       |                            |                       |                       |
| A1. Do you provide patient education on pregnancy tests?                                                  | <input type="radio"/> | <input type="radio"/> | <input type="radio"/>      | <input type="radio"/> | <input type="radio"/> |
| <b>B. Ovulation Tests</b>                                                                                 |                       |                       |                            |                       |                       |
| B1. Do you provide patient education on ovulation tests?                                                  | <input type="radio"/> | <input type="radio"/> | <input type="radio"/>      | <input type="radio"/> | <input type="radio"/> |
| <b>C. Contraception</b>                                                                                   |                       |                       |                            |                       |                       |
| C1. Do you provide patient education on male non-hormonal (barrier) contraceptives?                       | <input type="radio"/> | <input type="radio"/> | <input type="radio"/>      | <input type="radio"/> | <input type="radio"/> |
| C2. Do you provide combined hormonal contraceptives (CHC)?                                                | <input type="radio"/> | <input type="radio"/> | <input type="radio"/>      | <input type="radio"/> | <input type="radio"/> |
| C3. Do you provide patient education on hormonal contraception?                                           | <input type="radio"/> | <input type="radio"/> | <input type="radio"/>      | <input type="radio"/> | <input type="radio"/> |
| <b>E. Emergency contraception</b>                                                                         |                       |                       |                            |                       |                       |
| E1. Do you provide emergency contraception pills (ECPs)?                                                  | <input type="radio"/> | <input type="radio"/> | <input type="radio"/>      | <input type="radio"/> | <input type="radio"/> |
| E2. Do you provide patient education on ECPs?                                                             | <input type="radio"/> | <input type="radio"/> | <input type="radio"/>      | <input type="radio"/> | <input type="radio"/> |
| <b>F. Sexually Transmitted Infections (STIs)</b>                                                          |                       |                       |                            |                       |                       |
| F1. Do you provide patient education on STIs treatment?                                                   | <input type="radio"/> | <input type="radio"/> | <input type="radio"/>      | <input type="radio"/> | <input type="radio"/> |
| F2. Do you provide patient education on preventing STIs?                                                  | <input type="radio"/> | <input type="radio"/> | <input type="radio"/>      | <input type="radio"/> | <input type="radio"/> |
| <b>G. Maternal and perinatal health</b>                                                                   |                       |                       |                            |                       |                       |
| G1. Do you provide patient education on nutrition and vitamin supplementation for prenatal and pregnancy? | <input type="radio"/> | <input type="radio"/> | <input type="radio"/>      | <input type="radio"/> | <input type="radio"/> |
| G2. Do you provide information on safety of medications in pregnancy?                                     | <input type="radio"/> | <input type="radio"/> | <input type="radio"/>      | <input type="radio"/> | <input type="radio"/> |
| G3. Do you promote recommended vaccines for women prior to and during pregnancy?                          | <input type="radio"/> | <input type="radio"/> | <input type="radio"/>      | <input type="radio"/> | <input type="radio"/> |
| G5. Do you provide information on safety of medications in breastfeeding?                                 | <input type="radio"/> | <input type="radio"/> | <input type="radio"/>      | <input type="radio"/> | <input type="radio"/> |
| <b>H. General Sexual Health</b>                                                                           |                       |                       |                            |                       |                       |

LGTBQ+: Lesbian, gay, bisexual, transgender and queer (or questioning) and others.

|                                                                                    |                       |                       |                       |                       |                       |
|------------------------------------------------------------------------------------|-----------------------|-----------------------|-----------------------|-----------------------|-----------------------|
| H1. Do you provide patient education on sexual dysfunction related to medications? | <input type="radio"/> |
| H2. Do you assist female patients on options for sexual dysfunction?               | <input type="radio"/> |
| H3. Do you assist male patients on options for sexual dysfunction?                 | <input type="radio"/> |
| H4. Do you address health concerns/needs of LGBTQ+ patients?                       | <input type="radio"/> |

## II. Attitudes toward Sexual and Reproductive Health (SRH) services

Please indicate how strongly you agree or disagree with each of the following statements about SRH services:

|                                                                                                                                       | Strongly disagree     | Disagree              | Neutral               | Agree                 | Strongly agree        |
|---------------------------------------------------------------------------------------------------------------------------------------|-----------------------|-----------------------|-----------------------|-----------------------|-----------------------|
| a. It is an important part of a community pharmacist's role to offer advice on sexual and reproductive health                         | <input type="radio"/> |
| b. Community pharmacists are adequately trained to provide advice on sexual and reproductive health matters                           | <input type="radio"/> |
| c. There is a need for sexual health and reproductive services in the local area near the community pharmacy where I work             | <input type="radio"/> |
| d. Young people (25 years old and below) use/would use sexual and reproductive health services in the community pharmacy where I work | <input type="radio"/> |
| e. Pharmacists know when to advise patients on the need to consult a physician for sexual and reproductive health advice/treatment    | <input type="radio"/> |
| f. Community pharmacists should be more involved in sexually transmitted infections prevention, screening, testing, and treatment     | <input type="radio"/> |
| g. The patient is more likely to ask questions about sexual and reproductive health to a community pharmacist than his/her doctor     | <input type="radio"/> |
| h. I would be embarrassed giving sexual and reproductive health advice to patients                                                    | <input type="radio"/> |
| i. I have religious or moral objections to providing sexual and reproductive health services                                          | <input type="radio"/> |
| j. In the community pharmacy where I work, the sexual and reproductive health services currently offered are used regularly           | <input type="radio"/> |
| k. As a pharmacist, I have an ethical responsibility to provide SRH services                                                          | <input type="radio"/> |
| l. There is a need to expand the provision of sexual and reproductive health services in the community pharmacy where I work          | <input type="radio"/> |

---

Is there any **belief related to the provision of SRH services** that you would like to tell us about?

### III. Factors that influence community pharmacy SRH services

Please indicate to what extent you think the following factors impact the provision of sexual and reproductive health services at the community pharmacy where you work?

|                                                                            | No impact<br>on the<br>services | Little impact<br>on the<br>services | Neutral               | Somewhat<br>impacts the<br>services | Impacts the<br>services to a<br>great extent |
|----------------------------------------------------------------------------|---------------------------------|-------------------------------------|-----------------------|-------------------------------------|----------------------------------------------|
| a. Pharmacists' knowledge                                                  | <input type="radio"/>           | <input type="radio"/>               | <input type="radio"/> | <input type="radio"/>               | <input type="radio"/>                        |
| b. Pharmacy education at university                                        | <input type="radio"/>           | <input type="radio"/>               | <input type="radio"/> | <input type="radio"/>               | <input type="radio"/>                        |
| c. Opportunities for professional development                              | <input type="radio"/>           | <input type="radio"/>               | <input type="radio"/> | <input type="radio"/>               | <input type="radio"/>                        |
| d. Time required to provide services                                       | <input type="radio"/>           | <input type="radio"/>               | <input type="radio"/> | <input type="radio"/>               | <input type="radio"/>                        |
| e. Compensation for services                                               | <input type="radio"/>           | <input type="radio"/>               | <input type="radio"/> | <input type="radio"/>               | <input type="radio"/>                        |
| f. Community pharmacist's motivation to offer services                     | <input type="radio"/>           | <input type="radio"/>               | <input type="radio"/> | <input type="radio"/>               | <input type="radio"/>                        |
| g. Pharmacy owner/manager's motivation to support the offer of services    | <input type="radio"/>           | <input type="radio"/>               | <input type="radio"/> | <input type="radio"/>               | <input type="radio"/>                        |
| h. Public acceptance of services provided by pharmacists                   | <input type="radio"/>           | <input type="radio"/>               | <input type="radio"/> | <input type="radio"/>               | <input type="radio"/>                        |
| i. Consultation space (private/semiprivate room)                           | <input type="radio"/>           | <input type="radio"/>               | <input type="radio"/> | <input type="radio"/>               | <input type="radio"/>                        |
| j. Pharmacy staffing (workload, available staff)                           | <input type="radio"/>           | <input type="radio"/>               | <input type="radio"/> | <input type="radio"/>               | <input type="radio"/>                        |
| k. Access to practice tools or guidelines                                  | <input type="radio"/>           | <input type="radio"/>               | <input type="radio"/> | <input type="radio"/>               | <input type="radio"/>                        |
| l. Access to patients' information                                         | <input type="radio"/>           | <input type="radio"/>               | <input type="radio"/> | <input type="radio"/>               | <input type="radio"/>                        |
| m. Sharing information with other health professionals                     | <input type="radio"/>           | <input type="radio"/>               | <input type="radio"/> | <input type="radio"/>               | <input type="radio"/>                        |
| n. Patients' perception of confidentiality being maintained by pharmacists | <input type="radio"/>           | <input type="radio"/>               | <input type="radio"/> | <input type="radio"/>               | <input type="radio"/>                        |

Please provide any additional comments you might have about factors that influence the provision of SRH services below.

### IV. Sexual and Reproductive Health (SRH) competencies and training preferences

1. Would you like to expand your role in SRH services?

YES NO

☐ ☐

2. Would additional training be beneficial in expanding your role in SRH services?

YES NO

☐ ☐

**LGBTBQ+:** Lesbian, gay, bisexual, transgender and queer (or questioning) and others.

3. Please select the TOP 5 (five) SRH topics **you would like to receive more training:**

- ☐ Pregnancy tests
- ☐ Ovulation tests
- ☐ Barrier contraception for men (e.g. condoms)
- ☐ Hormonal contraception
- ☐ Emergency contraception
- ☐ Sexually transmitted and blood-borne infections (STBBI) treatment
- ☐ STBBIs prevention
- ☐ Pregnancy/Postpartum/Breastfeeding
- ☐ Sexual dysfunction
- ☐ Sexual health concerns of LGBTQ+ patients
- ☐ General Sexual Health
- ☐ None of above

4. The World Health Organization (WHO) identifies core SRH competencies that are desirable to deliver SRH services. These competencies are useful to protect, provide and promote SRH in the community.

From the following competencies suggested by the WHO, **please select the ones you would be interested in having more training: (select all that apply)**

**SRH skills, attitudes, and knowledge**

- ☐ Respect individual dignity – approach all patients in a non-judgmental and non-discriminatory manner
- ☐ Confidentiality and privacy – application to SRH
- ☐ Gender differences and diversity – identification and respect
- ☐ Education and counselling - recognize individual needs
- ☐ Counselling – use of appropriate and straightforward language
- ☐ Delivery of SRH care - deliver according to individual's and community's needs
- ☐ Health history recompilation – focus on factors related to SRH
- ☐ Referrals – gain knowledge in providing references when necessary (community-based resources and/or other health care providers)
